# Supplementary figures and images for: The 3D Organisation of Mitochondria in Primate Photoreceptors
Source: Research Square preprint supplement (doi:10.21203/rs.3.rs-588270/v1), 2021-06-10

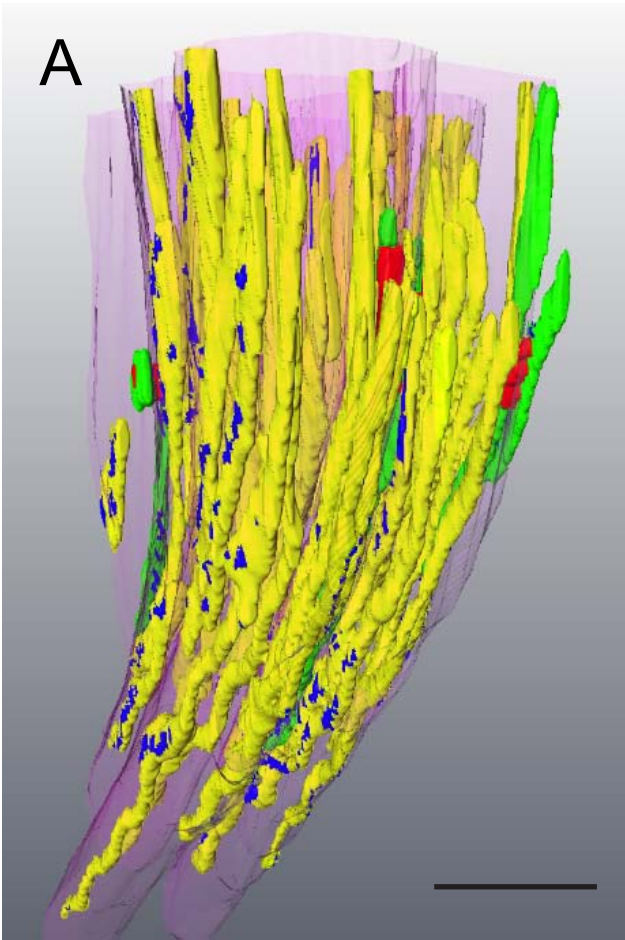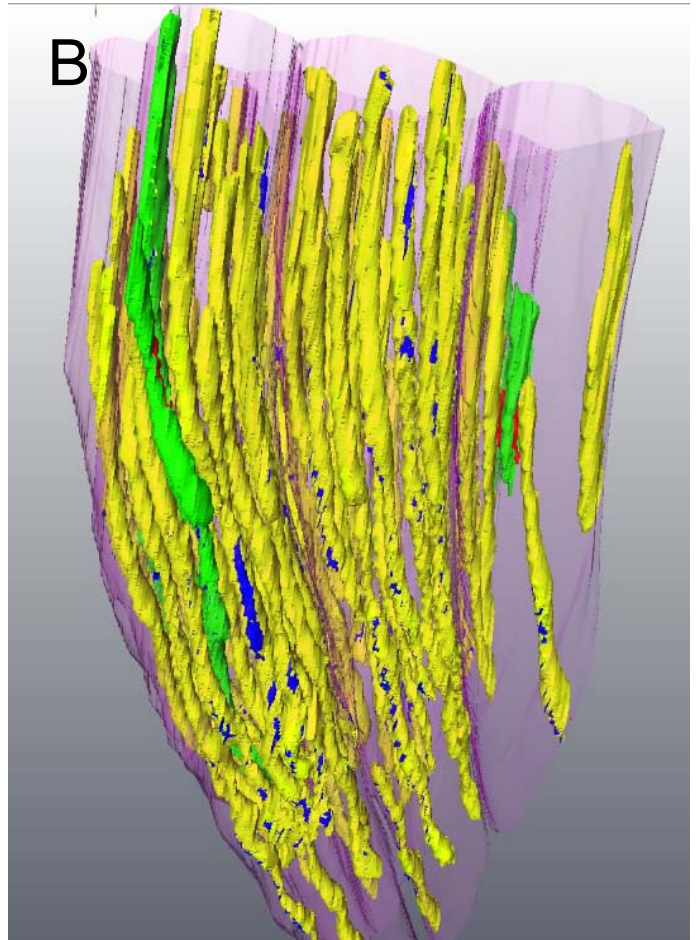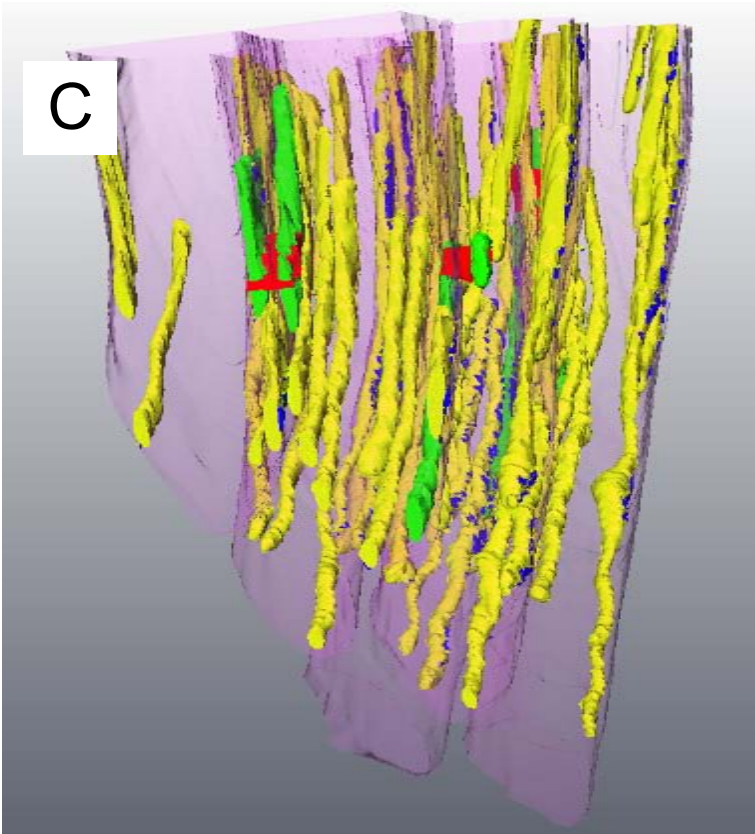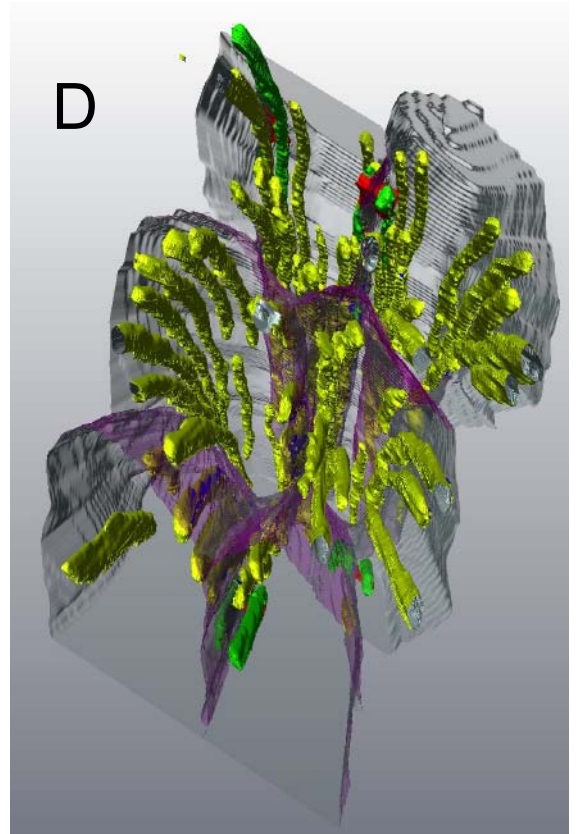

Supplement: Supplementary file 1 [file 388a934ab6f2f234ba48947a.pdf]
